# Supplementary material
Source: PubMed Central journal article supplement (PMC3100929)
Supplement: 1100428108_pnas.201100428SI.pdf [file 1100428108_pnas.201100428SI.pdf]

# Supporting Information

Drew et al. 10.1073/pnas.1100428108

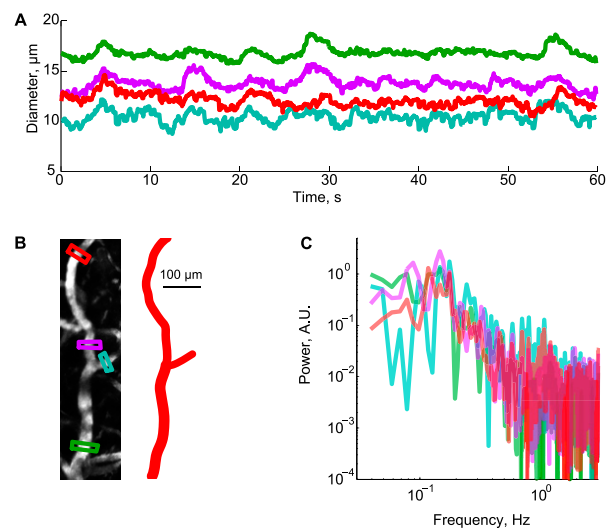

**Fig. S1.** Example of spontaneous oscillations in arterial diameter in an awake animal. (A) Plot of vessel diameters of a quietly resting mouse from a representative 1-min period. (B) *Left:* Image of surface vasculature taken where diameter measurements in A were taken. *Right:* Schematic showing position of artery in the image. (C) Power spectrum of the fluctuations in diameter of the same vessels.

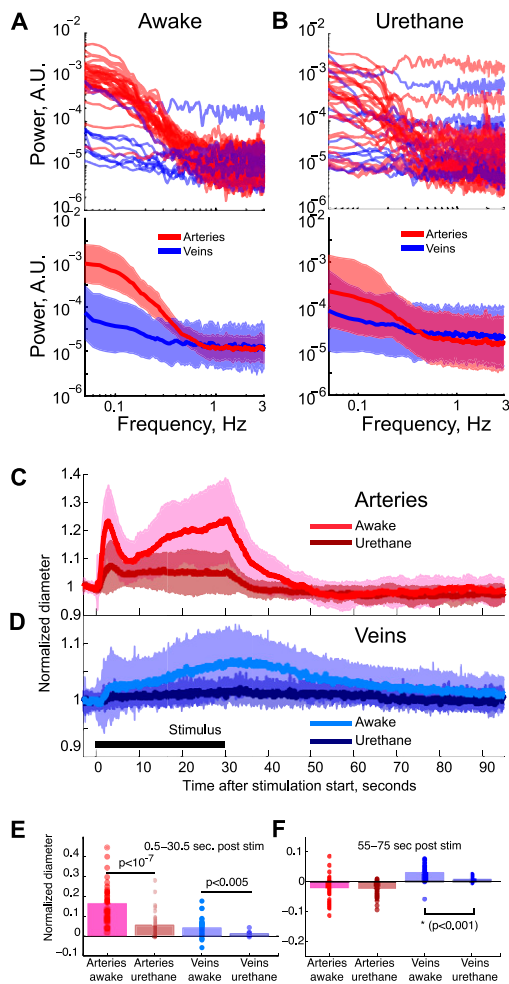

**Fig. S2.** Comparison of anesthetized and awake dynamics in awake and anesthetized mice. *Upper:* Power spectra for >500-s-long traces of arterial (red,  $n = 34$  vessels) and venous (blue,  $n = 7$  vessels) diameters from awake mice. *Lower:* Mean  $\pm$  SD. *(B)* Power spectra for >500-s-long traces of arterial (red,  $n = 30$  vessels) and venous (blue,  $n = 11$  vessels) diameters from urethane-anesthetized mice. There is a significant reduction in spectral power for arterioles in the 0.1- to 1-Hz range between the awake and anesthetized animals (Kolmogorov–Smirnov test done on log-transformed data,  $P < 0.001$ ). *(C)* Averaged relative response of arteries to vibrissa stimuli in the awake ( $n = 39$  vessels) and urethane-anesthetized ( $n = 39$  vessels) stimulus conditions. *(D)* Averaged normalized responses of veins in awake ( $n = 45$ ) and urethane-anesthetized animals ( $n = 18$  vessels). *(E)* Responses of arteries and veins averaged over stimuli for the period 0.5–30.5 s after stimulus onset. *(F)* Poststimulus responses of arteries and veins after a 30-s stimulus. Data is from 55–75 s after stimulus onset.



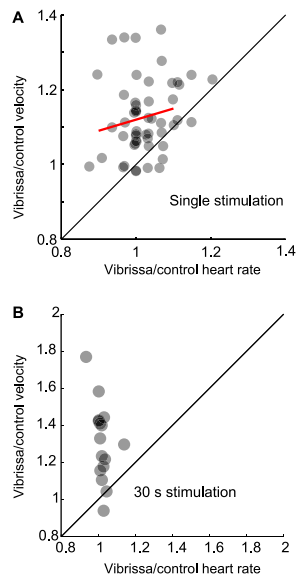

**Fig. S5.** Changes in heart rate do not explain differences between control and stimulus evoked changes. (A) Plot of ratio of vibrissa evoked speedup/control evoked speedup to vibrissa/control heart rate for single air puff stimuli.  $r^2 = 0.04$  and slope 0.12. (B) Plot of ratio of vibrissa evoked speedup/control evoked speedup to vibrissa/control heart rate during 30-s stimulation. Heart rate is determined from the peak in the power spectrum of the velocity.
